# Supplementary material
Source: HighWire-hosted journal article supplement (https://injuryprevention.bmj.com/content/27/2/104)
Supplement: inline-supplementary-material-1 [file inline-supplementary-material-1.pdf]

**Figure S1** A typical wooden Nepali home in rural area of Nepal

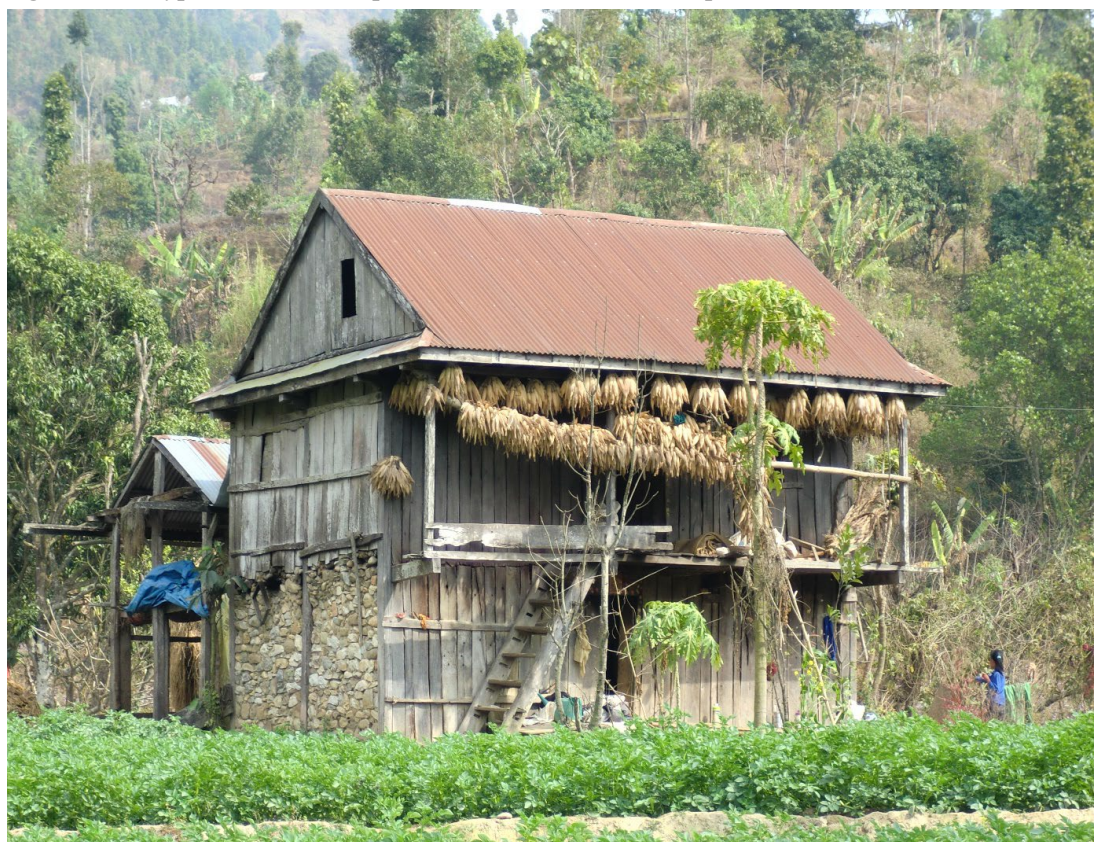

*Figure taken by an author with the permission of household member to use in publication*

**Table S1** Univariable logistic-regression results for the association between any injury and potential confounding variables

| Potential confounding variables                                                                                                                                                        |                               |                                |                                            |         |                      |
|----------------------------------------------------------------------------------------------------------------------------------------------------------------------------------------|-------------------------------|--------------------------------|--------------------------------------------|---------|----------------------|
| Potential confounding variables                                                                                                                                                        | No injury<br>N = 800<br>n (%) | Any injury<br>N = 233<br>n (%) | Adjusted for clustering at household level |         |                      |
|                                                                                                                                                                                        |                               |                                | Odds ratio<br>(95% CI)                     | P-value | Wald test<br>P value |
| Siblings under 18 years                                                                                                                                                                |                               |                                |                                            |         |                      |
| 0 siblings                                                                                                                                                                             | 88 (79.3)                     | 23 (20.7)                      | ...                                        | ...     | 0.713                |
| 1-4 siblings                                                                                                                                                                           | 635 (77.5)                    | 184 (22.5)                     | 1.11 (0.68, 1.80)                          | 0.678   |                      |
| > 4 siblings                                                                                                                                                                           | 77 (74.8)                     | 26 (25.2)                      | 1.29 (0.69, 2.42)                          | 0.424   |                      |
| Caregiver's age (years)                                                                                                                                                                |                               |                                |                                            |         |                      |
| ≤ 30                                                                                                                                                                                   | 376 (76.0)                    | 119 (24.0)                     | ...                                        | ...     | 0.265                |
| > 30                                                                                                                                                                                   | 424 (78.8)                    | 114 (21.2)                     | 0.85 (0.64, 1.13)                          | 0.265   |                      |
| Caregiver's education level                                                                                                                                                            |                               |                                |                                            |         |                      |
| Not literate                                                                                                                                                                           | 334 (74.1)                    | 117 (25.9)                     | ...                                        | ...     | 0.007                |
| Reading & writing ability                                                                                                                                                              | 181 (75.7)                    | 58 (24.3)                      | 0.94 (0.64, 1.31)                          | 0.626   |                      |
| School education                                                                                                                                                                       | 285 (83.1)                    | 58 (16.9)                      | 0.58 (0.41, 0.82)                          | 0.002   |                      |
| Caregiver's occupation                                                                                                                                                                 |                               |                                |                                            |         |                      |
| Employed/able to work                                                                                                                                                                  | 622 (77.1)                    | 185 (22.9)                     | ...                                        | ...     | 0.577                |
| Unemployed/unable to work                                                                                                                                                              | 178 (78.8)                    | 48 (21.2)                      | 0.91 (0.64, 1.28)                          | 0.577   |                      |
| Family size                                                                                                                                                                            |                               |                                |                                            |         |                      |
| ≤ 4 people (small)                                                                                                                                                                     | 135 (75.8)                    | 43 (24.2)                      | ...                                        | ...     | 0.368                |
| 5-8 people (medium)                                                                                                                                                                    | 462 (76.6)                    | 141 (23.4)                     | 0.96 (0.65, 1.42)                          | 0.830   |                      |
| > 8 people (large)                                                                                                                                                                     | 203 (80.6)                    | 49 (19.4)                      | 0.76 (0.48, 1.20)                          | 0.234   |                      |
| Family members over 18 years of age                                                                                                                                                    |                               |                                |                                            |         |                      |
| ≤ 2 people                                                                                                                                                                             | 304 (74.0)                    | 107 (26.0)                     | ...                                        | ...     | 0.027                |
| > 2 people                                                                                                                                                                             | 496 (79.7)                    | 126 (20.3)                     | 0.72 (0.54, 0.96)                          | 0.027   |                      |
| Ethnic groups*                                                                                                                                                                         |                               |                                |                                            |         |                      |
| Underprivileged                                                                                                                                                                        | 629 (78.7)                    | 170 (21.3)                     | ...                                        | ...     | 0.076                |
| Privileged                                                                                                                                                                             | 171 (73.1)                    | 63 (26.9)                      | 1.36 (0.97, 1.92)                          | 0.076   |                      |
| Household income per month in 2 quantiles (NRs.)                                                                                                                                       |                               |                                |                                            |         |                      |
| Q 1 (NRs. 1000-10,000)                                                                                                                                                                 | 431 (77.9)                    | 122 (22.1)                     | ...                                        | ...     | 0.678                |
| Q 2 (NRs. 1000-1,40,000)                                                                                                                                                               | 369 (76.9)                    | 111 (23.1)                     | 1.06 (0.80, 1.42)                          | 0.678   |                      |
| No. of floors in the house                                                                                                                                                             |                               |                                |                                            |         |                      |
| 1-2                                                                                                                                                                                    | 536 (78.6)                    | 146 (21.4)                     | ...                                        | ...     | 0.214                |
| 3                                                                                                                                                                                      | 264 (75.2)                    | 87 (24.8)                      | 1.21 (0.90, 1.63)                          | 0.214   |                      |
| House ownership                                                                                                                                                                        |                               |                                |                                            |         |                      |
| Owner-occupied                                                                                                                                                                         | 770 (78.2)                    | 215 (21.8)                     | ...                                        | ...     | 0.013                |
| Rented                                                                                                                                                                                 | 30 (62.5)                     | 18 (37.5)                      | 2.15 (1.17, 3.64)                          | 0.013   |                      |
| House age                                                                                                                                                                              |                               |                                |                                            |         |                      |
| ≤ 20 years                                                                                                                                                                             | 577 (78.0)                    | 163 (22.0)                     | ...                                        | ...     | 0.504                |
| > 20 years                                                                                                                                                                             | 223 (76.1)                    | 70 (23.9)                      | 1.11 (0.82, 1.51)                          | 0.504   |                      |
| No. of rooms                                                                                                                                                                           |                               |                                |                                            |         |                      |
| 1-3                                                                                                                                                                                    | 583 (78.0)                    | 164 (22.0)                     | ...                                        | ...     | 0.447                |
| 4-10                                                                                                                                                                                   | 217 (75.9)                    | 69 (24.1)                      | 1.13 (0.82, 1.55)                          | 0.447   |                      |
| *Ethnic groups like Dalit and Disadvantaged Janajatis made up the ‘underprivileged’ category. Relatively advantaged Janajatis and Upper caste groups made up the ‘privileged’ category |                               |                                |                                            |         |                      |

**Table S2** Univariable logistic-regression results for the association between fall-related injury and potential confounding variables

| Potential confounding variables                                                                                                                                                                                                                                                                                                                                                                                                                                                                                                                          | No fall<br>N = 944<br>n (%) | Fall<br>N = 89<br>n (%) | Adjusted for clustering at household level |         |                      |
|----------------------------------------------------------------------------------------------------------------------------------------------------------------------------------------------------------------------------------------------------------------------------------------------------------------------------------------------------------------------------------------------------------------------------------------------------------------------------------------------------------------------------------------------------------|-----------------------------|-------------------------|--------------------------------------------|---------|----------------------|
|                                                                                                                                                                                                                                                                                                                                                                                                                                                                                                                                                          |                             |                         | Odds ratio<br>(95% CI)                     | P-value | Wald test<br>P value |
| Siblings under 18 years of age                                                                                                                                                                                                                                                                                                                                                                                                                                                                                                                           |                             |                         |                                            |         |                      |
| 0 siblings                                                                                                                                                                                                                                                                                                                                                                                                                                                                                                                                               | 101 (91.0)                  | 10 (9.0)                | ...                                        | ...     | 0.950                |
| 1-4 siblings                                                                                                                                                                                                                                                                                                                                                                                                                                                                                                                                             | 748 (91.3)                  | 71 (8.7)                | 0.96 (0.48, 1.92)                          | 0.905   |                      |
| > 4 siblings                                                                                                                                                                                                                                                                                                                                                                                                                                                                                                                                             | 95 (92.2)                   | 8 (7.8)                 | 0.85 (0.31, 2.37)                          | 0.757   |                      |
| Caregiver's age (years)                                                                                                                                                                                                                                                                                                                                                                                                                                                                                                                                  |                             |                         |                                            |         |                      |
| ≤ 30                                                                                                                                                                                                                                                                                                                                                                                                                                                                                                                                                     | 448 (90.5)                  | 47 (9.5)                | ...                                        | ...     | 0.343                |
| > 30                                                                                                                                                                                                                                                                                                                                                                                                                                                                                                                                                     | 496 (92.2)                  | 42 (7.8)                | 0.81 (0.52, 1.26)                          | 0.343   |                      |
| Caregiver's education level                                                                                                                                                                                                                                                                                                                                                                                                                                                                                                                              |                             |                         |                                            |         |                      |
| Not literate                                                                                                                                                                                                                                                                                                                                                                                                                                                                                                                                             | 412 (91.4)                  | 39 (8.6)                | ...                                        | ...     | 0.590                |
| Reading & writing ability                                                                                                                                                                                                                                                                                                                                                                                                                                                                                                                                | 215 (90.0)                  | 24 (10.0)               | 1.18 (0.68, 2.05)                          | 0.560   |                      |
| School education                                                                                                                                                                                                                                                                                                                                                                                                                                                                                                                                         | 317 (92.4)                  | 26 (7.6)                | 0.87 (0.52, 1.45)                          | 0.588   |                      |
| #Caregiver's occupation                                                                                                                                                                                                                                                                                                                                                                                                                                                                                                                                  |                             |                         |                                            |         |                      |
| Employed/able to work                                                                                                                                                                                                                                                                                                                                                                                                                                                                                                                                    | 728 (90.2)                  | 79 (9.8)                | ...                                        | ...     | 0.013                |
| Unemployed/unable to work                                                                                                                                                                                                                                                                                                                                                                                                                                                                                                                                | 216 (95.6)                  | 10 (4.4)                | 0.43 (0.22, 0.83)                          | 0.013   |                      |
| Family size                                                                                                                                                                                                                                                                                                                                                                                                                                                                                                                                              |                             |                         |                                            |         |                      |
| ≤ 4 people (small)                                                                                                                                                                                                                                                                                                                                                                                                                                                                                                                                       | 157 (88.2)                  | 21 (11.8)               | ...                                        | ...     | 0.076                |
| 5-8 people (medium)                                                                                                                                                                                                                                                                                                                                                                                                                                                                                                                                      | 549 (91.0)                  | 54 (9.0)                | 0.74 (0.42, 1.28)                          | 0.247   |                      |
| > 8 people (large)                                                                                                                                                                                                                                                                                                                                                                                                                                                                                                                                       | 238 (94.4)                  | 14 (5.6)                | 0.44 (0.22, 0.90)                          | 0.024   |                      |
| Family member over 18 years of age                                                                                                                                                                                                                                                                                                                                                                                                                                                                                                                       |                             |                         |                                            |         |                      |
| ≤ 2 people                                                                                                                                                                                                                                                                                                                                                                                                                                                                                                                                               | 370 (90.0)                  | 41 (10.0)               | ...                                        | ...     | 0.216                |
| > 2 people                                                                                                                                                                                                                                                                                                                                                                                                                                                                                                                                               | 574 (92.3)                  | 48 (7.7)                | 0.75 (0.48, 1.18)                          | 0.216   |                      |
| #Ethnic group*                                                                                                                                                                                                                                                                                                                                                                                                                                                                                                                                           |                             |                         |                                            |         |                      |
| Underprivileged                                                                                                                                                                                                                                                                                                                                                                                                                                                                                                                                          | 744 (93.1)                  | 55 (6.9)                | ...                                        | ...     | 0.001                |
| Privileged                                                                                                                                                                                                                                                                                                                                                                                                                                                                                                                                               | 200 (85.5)                  | 34 (14.5)               | 2.30 (1.43, 3.69)                          | 0.001   |                      |
| Household income per month in 2 quantiles (NRs.)                                                                                                                                                                                                                                                                                                                                                                                                                                                                                                         |                             |                         |                                            |         |                      |
| Q 1 (NRs. 1000-10,000)                                                                                                                                                                                                                                                                                                                                                                                                                                                                                                                                   | 512 (92.6)                  | 41 (7.4)                | ...                                        | ...     | 0.148                |
| Q 2 (NRs. 1000-1,40,000)                                                                                                                                                                                                                                                                                                                                                                                                                                                                                                                                 | 432 (90.0)                  | 48 (10.0)               | 1.39 (0.89, 2.16)                          | 0.148   |                      |
| No. of floors in the house                                                                                                                                                                                                                                                                                                                                                                                                                                                                                                                               |                             |                         |                                            |         |                      |
| 1-2                                                                                                                                                                                                                                                                                                                                                                                                                                                                                                                                                      | 633 (92.8)                  | 49 (7.2)                | ...                                        | ...     | 0.026                |
| 3                                                                                                                                                                                                                                                                                                                                                                                                                                                                                                                                                        | 311 (88.6)                  | 40 (11.4)               | 1.66 (1.06, 2.60)                          | 0.026   |                      |
| House ownership                                                                                                                                                                                                                                                                                                                                                                                                                                                                                                                                          |                             |                         |                                            |         |                      |
| Owner-occupied                                                                                                                                                                                                                                                                                                                                                                                                                                                                                                                                           | 907 (92.1)                  | 78 (7.9)                | ...                                        | ...     | <0.001               |
| Rented                                                                                                                                                                                                                                                                                                                                                                                                                                                                                                                                                   | 37 (77.1)                   | 11 (22.9)               | 3.46 (1.73, 6.91)                          | <0.001  |                      |
| House age                                                                                                                                                                                                                                                                                                                                                                                                                                                                                                                                                |                             |                         |                                            |         |                      |
| ≤ 20 years                                                                                                                                                                                                                                                                                                                                                                                                                                                                                                                                               | 677 (91.5)                  | 63 (8.5)                | ...                                        | ...     | 0.855                |
| > 20 years                                                                                                                                                                                                                                                                                                                                                                                                                                                                                                                                               | 267 (91.1)                  | 26 (8.9)                | 1.05 (0.64, 1.70)                          | 0.855   |                      |
| #No. of rooms                                                                                                                                                                                                                                                                                                                                                                                                                                                                                                                                            |                             |                         |                                            |         |                      |
| 1-3                                                                                                                                                                                                                                                                                                                                                                                                                                                                                                                                                      | 694 (92.9)                  | 53 (7.1)                | ...                                        | ...     | 0.006                |
| 4-10                                                                                                                                                                                                                                                                                                                                                                                                                                                                                                                                                     | 250 (87.4)                  | 36 (12.6)               | 1.89 (1.19, 2.98)                          | 0.006   |                      |
| *Ethnic groups like Dalit and Disadvantaged Janajatis made up the ‘underprivileged’ category. Relatively advantaged Janajatis and Upper caste groups made up the ‘privileged’ category<br># A positive association of caregiver's occupation, ethnic group and no. of rooms to the outcome “Falls” is observed. These observed associations could be related to the level of supervision. For example, children whose caregivers were unemployed or unable to work (elderly) may be more likely to stay at home and thus have more time to supervise the |                             |                         |                                            |         |                      |

children. This may reduce the risk of fall-related injury in comparison to children whose caregivers were employed or able to work. Similarly, privileged families may be more likely to have bigger homes with larger numbers of room or stories, and this may limit the caregiver's ability to supervise children that are mobile and may increase the risk of falls on stairs or from balconies. The same rationale may explain the increased risk of fall-related injuries in children living in households with 4-10 rooms when compared to children living in households with 1-3 rooms. These observed univariable associations should not be over interpreted as they were not consistently found across other types of injuries and therefore need to be tested in future studies.

**Table S3** Univariable logistic-regression results for the association between fire-related/burn/scald injury and potential confounding variables

| Potential<br>confounding variables               | No burn<br>N = 966<br>n (%) | Burn<br>N = 67<br>n (%) | Adjusted for clustering at household level |          |                      |
|--------------------------------------------------|-----------------------------|-------------------------|--------------------------------------------|----------|----------------------|
|                                                  |                             |                         | Odds ratio<br>(95% CI)                     | P-value  | Wald test<br>P value |
| Siblings under 18 years                          |                             |                         |                                            |          |                      |
| 0 siblings                                       | 104 (93.7)                  | 7 (6.3)                 | ...                                        | ...      | 0.988                |
| 1-4 siblings                                     | 766 (93.5)                  | 53 (6.5)                | 1.03 (0.45, 2.32)                          | 0.947    |                      |
| > 4 siblings                                     | 96 (93.2)                   | 7 (6.8)                 | 1.08 (0.38, 3.10)                          | 0.881    |                      |
| Caregiver's age (years)                          |                             |                         |                                            |          |                      |
| ≤ 30                                             | 459 (92.7)                  | 36 (7.3)                | ...                                        | ...      | 0.323                |
| > 30                                             | 507 (94.2)                  | 31 (5.8)                | 0.78 (0.48, 1.28)                          | 0.323    |                      |
| Caregiver's education level                      |                             |                         |                                            |          |                      |
| Not literate                                     | 414 (91.8)                  | 37 (8.2)                | ...                                        | ...      | 0.147                |
| Reading & writing ability                        | 227 (95.0)                  | 12 (5.0)                | 0.59 (0.29, 1.19)                          | 0.143    |                      |
| School education                                 | 325 (94.8)                  | 18 (5.2)                | 0.62 (0.35, 1.10)                          | 0.101    |                      |
| Caregiver's occupation                           |                             |                         |                                            |          |                      |
| Employed/able to work                            | 757 (93.8)                  | 50 (6.2)                | ...                                        | ...      | 0.466                |
| Unemployed/unable to work                        | 209 (92.5)                  | 17 (7.5)                | 1.23 (0.70, 2.16)                          | 0.466    |                      |
| Family size                                      |                             |                         |                                            |          |                      |
| ≤ 4 people (small)                               | 165 (92.7)                  | 13 (7.3)                | ...                                        | ...      | 0.587                |
| 5-8 people (medium)                              | 562 (93.2)                  | 41 (6.8)                | 0.93 (0.47, 1.82)                          | 0.824    |                      |
| > 8 people (large)                               | 239 (94.8)                  | 13 (5.2)                | 0.69 (0.31, 1.54)                          | 0.366    |                      |
| Family member over 18 years of age               |                             |                         |                                            |          |                      |
| ≤ 2 people                                       | 377 (91.7)                  | 34 (8.3)                | ...                                        | ...      | 0.059                |
| > 2 people                                       | 589 (94.7)                  | 33 (5.3)                | 0.62 (0.38, 1.02)                          | 0.059    |                      |
| Ethnic group*                                    |                             |                         |                                            |          |                      |
| Underprivileged                                  | 747 (93.5)                  | 52 (6.5)                | ...                                        | ...      | 0.957                |
| Privileged                                       | 219 (93.6)                  | 15 (6.4)                | 0.98 (0.55, 1.77)                          | 0.957    |                      |
| Household income per month in 2 quantiles (NRs.) |                             |                         |                                            |          |                      |
| Q 1 (NRs. 1000-10,000)                           | 511 (92.4)                  | 42 (7.6)                | ...                                        | ...      | 0.118                |
| Q 2 (NRs. 1000-1,40,000)                         | 455 (94.8)                  | 25 (5.2)                | 0.67 (0.40, 1.10)                          | 0.118    |                      |
| No. of floors in the house                       |                             |                         |                                            |          |                      |
| 1-2                                              | 638 (93.5)                  | 44 (6.5)                | ...                                        | ...      | 0.949                |
| 3                                                | 328 (93.4)                  | 23 (6.6)                | 1.02 (0.61, 1.70)                          | 0.949    |                      |
| House ownership                                  |                             |                         |                                            |          |                      |
| Owner-occupied                                   | 921 (93.5)                  | 64 (6.5)                | ...                                        | ...      | 1.000                |
| Rented                                           | 45 (93.8)                   | 3 (6.3)                 | 0.96 (0.30, 3.07)                          | FE 1.000 |                      |
| House age                                        |                             |                         |                                            |          |                      |
| ≤ 20 years                                       | 691 (93.4)                  | 49 (6.6)                | ...                                        | ...      | 0.773                |
| > 20 years                                       | 275 (93.9)                  | 18 (6.1)                | 0.92 (0.54, 1.59)                          | 0.773    |                      |

| No. of rooms                                                                                                                                                                           |            |          |                   |       |       |
|----------------------------------------------------------------------------------------------------------------------------------------------------------------------------------------|------------|----------|-------------------|-------|-------|
| 1-3                                                                                                                                                                                    | 697 (93.3) | 50 (6.7) | ...               | ...   | 0.653 |
| 4-10                                                                                                                                                                                   | 269 (94.1) | 17 (5.9) | 0.88 (0.51, 1.53) | 0.653 |       |
| *Ethnic groups like Dalit and Disadvantaged Janajatis made up the ‘underprivileged’ category. Relatively advantaged Janajatis and Upper caste groups made up the ‘privileged’ category |            |          |                   |       |       |

**Table S4** Univariable logistic-regression results for the association between cut/crush-induced injury and potential confounding variables

| Potential confounding variables                  | No cut<br>N = 980<br>n (%) | Cut<br>N = 53<br>n (%) | Adjusted for clustering at household level |          |                      |
|--------------------------------------------------|----------------------------|------------------------|--------------------------------------------|----------|----------------------|
|                                                  |                            |                        | Odds ratio<br>(95% CI)                     | P-value  | Wald test<br>P value |
| Siblings under 18 years of age                   |                            |                        |                                            |          |                      |
| 0 siblings                                       | 106 (95.5)                 | 5 (4.5)                | ...                                        | ...      | 0.440                |
| 1-4 siblings                                     | 779 (95.1)                 | 40 (4.9)               | 1.09 (0.42, 2.81)                          | 0.861    |                      |
| > 4 siblings                                     | 95 (92.2)                  | 8 (7.8)                | 1.79 (0.56, 5.64)                          | 0.324    |                      |
| Caregiver's age (years)                          |                            |                        |                                            |          |                      |
| ≤ 30                                             | 470 (94.9)                 | 25 (5.1)               | ...                                        | ...      | 0.910                |
| > 30                                             | 510 (94.8)                 | 28 (5.2)               | 1.03 (0.60, 1.78)                          | 0.910    |                      |
| Caregiver's education level                      |                            |                        |                                            |          |                      |
| Not literate                                     | 422 (93.6)                 | 29 (6.4)               | ...                                        | ...      | 0.022                |
| Reading & writing ability                        | 223 (93.3)                 | 16 (6.7)               | 1.04 (0.56, 1.94)                          | 0.891    |                      |
| School education                                 | 335 (97.7)                 | 8 (2.3)                | 0.35 (0.16, 0.77)                          | 0.009    |                      |
| Caregiver's occupation                           |                            |                        |                                            |          |                      |
| Employed/able to work                            | 771 (95.5)                 | 36 (4.5)               | ...                                        | ...      | 0.063                |
| Unemployed/unable to work                        | 209 (92.5)                 | 17 (7.5)               | 1.74 (0.97, 3.13)                          | 0.063    |                      |
| Family size                                      |                            |                        |                                            |          |                      |
| ≤ 4 people (small)                               | 172 (96.6)                 | 6 (3.4)                | ...                                        | ...      | 0.504                |
| 5-8 people (medium)                              | 570 (94.5)                 | 33 (5.5)               | 1.66 (0.69, 3.99)                          | 0.258    |                      |
| > 8 people (large)                               | 238 (94.4)                 | 14 (5.6)               | 1.69 (0.64, 4.42)                          | 0.288    |                      |
| Family member over 18 years of age               |                            |                        |                                            |          |                      |
| ≤ 2 people                                       | 388 (94.4)                 | 23 (5.6)               | ...                                        | ...      | 0.576                |
| > 2 people                                       | 592 (95.2)                 | 30 (4.8)               | 0.85 (0.49, 1.48)                          | 0.576    |                      |
| Ethnic group*                                    |                            |                        |                                            |          |                      |
| Underprivileged                                  | 758 (94.9)                 | 41 (5.1)               | ...                                        | ...      | 0.998                |
| Privileged                                       | 222 (94.9)                 | 12 (5.1)               | 1.00 (0.52, 1.92)                          | 0.998    |                      |
| Household income per month in 2 quantiles (NRs.) |                            |                        |                                            |          |                      |
| Q 1 (NRs. 1000-10,000)                           | 527 (95.3)                 | 26 (4.7)               | ...                                        | ...      | 0.497                |
| Q 2 (NRs. 1000-1,40,000)                         | 453 (94.4)                 | 27 (5.6)               | 1.21 (0.70, 2.09)                          | 0.497    |                      |
| No. of floors in the house                       |                            |                        |                                            |          |                      |
| 1-2                                              | 645 (94.6)                 | 37 (5.4)               | ...                                        | ...      | 0.547                |
| 3                                                | 335 (95.4)                 | 16 (4.6)               | 0.83 (0.46, 1.51)                          | 0.547    |                      |
| House ownership                                  |                            |                        |                                            |          |                      |
| Owner-occupied                                   | 934 (94.8)                 | 51 (5.2)               | ...                                        | ...      | 1.000                |
| Rented                                           | 46 (95.8)                  | 2 (4.2)                | 0.80 (0.19, 3.32)                          | FE 1.000 |                      |
| House age                                        |                            |                        |                                            |          |                      |
| ≤ 20 years                                       | 703 (95.0)                 | 37 (5.0)               | ...                                        | ...      | 0.761                |
| > 20 years                                       | 277 (94.5)                 | 16 (5.5)               | 1.10 (0.60, 2.00)                          | 0.761    |                      |
| No. of rooms                                     |                            |                        |                                            |          |                      |

|                                                                                                                                                                                        |            |          |                   |       |       |
|----------------------------------------------------------------------------------------------------------------------------------------------------------------------------------------|------------|----------|-------------------|-------|-------|
| 1-3                                                                                                                                                                                    | 705 (94.4) | 42 (5.6) | ...               | ...   | 0.247 |
| 4-10                                                                                                                                                                                   | 275 (96.2) | 11 (3.8) | 0.67 (0.34, 1.32) | 0.247 |       |
| *Ethnic groups like Dalit and Disadvantaged Janajatis made up the ‘underprivileged’ category. Relatively advantaged Janajatis and Upper caste groups made up the ‘privileged’ category |            |          |                   |       |       |
